# Novel Mechanism for Surface Layer Shedding and Regenerating in Bacteria Exposed to Metal-Contaminated Conditions

1 Archjana Chandramohan<sup>1</sup>, Elodie Duprat<sup>2</sup>, Laurent Remusat<sup>2</sup>, Severine Zirah<sup>1</sup>, Carine  
2 Lombard<sup>1</sup>, Adrienne Kish<sup>1\*</sup>

3 <sup>1</sup>Unité Molécules de Communication et Adaptation des Microorganismes (MCAM), Muséum  
4 national d'Histoire naturelle, UMR CNRS 7245, CP54, 57 rue Cuvier, 75005 Paris, France

5 <sup>2</sup> Institut de Minéralogie, Physique des Matériaux et de Cosmochimie (IMPMC), Sorbonne  
6 Université, UMR CNRS 7590, IRD UMR 206, 4 place Jussieu, 75005 Paris, France

7 \* **Correspondence:**

8 Adrienne Kish  
9 adrienne.kish@mnhn.fr

10 **Keywords:** S-layer<sub>1</sub>, bioremediation<sub>2</sub>, metal<sub>3</sub>, biomineralization<sub>4</sub>, metallotolerance<sub>5</sub>,  
11 *Lysinibacillus*<sub>6</sub>. (Min.5-Max. 8)

## 12 Abstract

13 Surface layers (S-layers) are self-assembling, ordered structures composed of repeating protein  
14 subunits found as components of the cell walls throughout the Bacteria and the Archaea. S-layers act  
15 as an interface between prokaryotic cells and their surrounding environment, and provide protection  
16 for microorganisms against diverse environmental stresses including heavy metal stress. We have  
17 previously characterized the process by which S-layers serve as a nucleation site for metal  
18 mineralization in the presence of high concentration of metals. Here, we test the hypothesis originally  
19 proposed in cyanobacteria that a “shedding” mechanism exists in prokaryotes for replacing S-layers  
20 that have become mineral-encrusted. We used a metallotolerant gram-positive bacterium bearing an  
21 S-layer, *Lysinibacillus* sp. TchIII 20n38, as a model organism. We characterize for the first time a  
22 mechanism for resistance to metals through S-layer shedding and regeneration. S-layers nucleate the  
23 formation of Fe-mineral on the cell surface, leading to the encrustation of the S-layer. Using a  
24 combination of scanning electron microscopy (SEM) and nanoSIMS, we show that mineral-encrusted  
25 S-layers are shed by the bacterial cells, and the emerging cells regenerate new S-layers as part of  
26 their cell wall structure. This novel mechanism for the survival of prokaryotes in metal-contaminated  
27 environments may also provide elements necessary for the development of renewable systems for  
28 metal bioremediation.

## 29 1 Introduction

30 Environmental contamination by metals and radionuclides from activities such as mining and nuclear  
31 power generation pose a serious risk to human health. The sudden, accidental release of high  
32 concentrations of iron from acid mine drainage from the Gold King Mine polluted the Animas River  
33 in 2015, mixing downstream with phosphates from agricultural runoff (Rodriguez-Freire et al.,  
34 2016). Metal contamination affected both water supplies from soluble metals, and sediments after the  
35 sedimentation of the majority of released metals. Sampling of soils contaminated by metals and  
36 radionuclides near the former Chernobyl nuclear reactor site (Chapon et al., 2012) and in uranium  
37 mining waste piles in Germany (Pollmann et al., 2006) have identified bacteria of the genre

38 *Lysinibacillus* tolerant to these contaminants. *Lysinibacillus* (formerly classified as part of the  
39 *Bacillus* genus (Ahmed et al., 2007)) gram-positive bacteria, with a peptidoglycan cell wall enclosed  
40 by a surface layer ("S-layer") attached non-covalently to the lipopolysaccharides of the outer  
41 membrane (reviewed in (Sleytr et al., 2014)). These S-layers have proven to be a key mechanism for  
42 metallotolerance in *Lysinibacillus* as they have been shown to bind U, Pd(II), Cu, Pt(II), and Au(III)  
43 (Pollmann et al., 2006).

44 S-layers, however are not unique to *Lysinibacillus*. They are common components of the cell  
45 envelopes of both bacteria and archaea. S-layers are formed by self-assembly of repeated protein  
46 monomers into ordered structures (oblique, square, or hexagonal) depending on the number of  
47 subunits composing the ordered structure. This self-assembly occurs even in the absence of cells *in*  
48 *vitro*; a capacity has been exploited in biotechnology in everything from the development of vaccine  
49 to nanomaterials to filtration technologies (Sleytr et al., 2011).

50 S-layers form the interaction interface between prokaryotic cells and their external environment, and  
51 are therefore in contact with metals and other ions present. Nucleation of mineralization by S-layers  
52 was first noted in cyanobacteria by Schultze-Lam in the early 1990s (Schultze-Lam et al., 1992).  
53 Cyanobacterial S-layers were demonstrated to nucleate the formation of carbonates of calcium,  
54 magnesium, and strontium (Schultze-Lam and Beveridge, 1994). In their 1992 article, Schultze-Lam  
55 proposed the hypothesis that mineral-encrusted S-layers are shed from cyanobacteria as part of a  
56 protective mechanism to ensure that essential cell activities are maintained despite cell wall  
57 mineralization (Schultze-Lam et al., 1992). This hypothesis was, however, never fully tested. Since  
58 then, S-layer nucleation of mineralization has been observed in a range of bacteria (Konhauser et al.,  
59 1994; Phoenix et al., 2000) and archaea (Kish et al., 2016).

60 S-layer mineralization is a mechanism for metallotolerance with potential application in  
61 bioremediation. S-layer shedding and regeneration in metallotolerant bacteria already inhabiting  
62 contaminated environments provides an added benefit of being a renewable system. Here, we  
63 describe the shedding and regeneration of mineral-encrusted S-layers in the metallotolerant  
64 environmental isolate *Lysinibacillus* sp. TchIII 20n38.

## 65 **2 Materials and Methods**

### 66 **2.1 Culture and growth conditions**

67 The bacterial strain used was an environmental strain isolated in 2009 from soils near a radionuclide-  
68 contaminated site (Chapon et al., 2012). This strain, referenced as *Lysinibacillus* sp. TchIII 20n38,  
69 was cultured at 30 °C in Luria Bertani (LB) medium under aerobic conditions with agitation  
70 (180 rpm) to mid-exponential, late-exponential, and stationary growth phases ( $OD_{600nm} = 0.3, 0.6,$  and  
71  $1.0,$  respectively). The culture medium was then removed and the cells washed in MilliQ-H<sub>2</sub>O by  
72 gentle centrifugation (2600 x g, 15 min, room temperature). In order to determine the mechanisms of  
73 resistance of *Lysinibacillus* sp. TchIII 20n38 cells to the presence of heavy metals, the cells were  
74 resuspended to an equivalent cell density in a Fe-rich solution at a similar pH to that found in the  
75 Chernobyl isolation (10 mM NaH<sub>2</sub>PO<sub>4</sub>, 10 mM FeSO<sub>4</sub>, pH=4.5), and agitated (150 rpm, 30 °C) with  
76 for up to 5 days. Cells were filtered and observed by scanning electron microscopy as described  
77 below.

### 78 **2.2 Mineralization Recovery Time Course**

79 In order to test the hypothesis that mineral-encrusted S-layers are shed and regenerated, a time course  
80 of recovery was followed after Fe-mineralization as follows: *Lysinibacillus* sp. TchIII 20n38 cells  
81 were grown to mid-exponential growth phase ( $OD_{600nm} = 0.3$ ) in LB (30 °C, 180 rpm). The culture  
82 medium was then removed and the cells washed in MilliQ-H<sub>2</sub>O by gentle centrifugation (2600 x g,  
83 15 min, room temperature). The cells were then resuspended to an equivalent cell density in either a  
84 mineralization solution (10 mM NaH<sub>2</sub>PO<sub>4</sub>, 10 mM FeSO<sub>4</sub>, pH=4.5), or a nutrient-free buffered  
85 solution at the same pH (10 mM NaH<sub>2</sub>PO<sub>4</sub>, pH=4.5), and agitated (30 °C, 150 rpm) for 16 h. The  
86 mineralization solution was then removed and the cells washed in MilliQ-H<sub>2</sub>O by gentle  
87 centrifugation (2600 x g, 15 min, room temperature), and replaced by growth medium (LB, or  
88 labelled growth medium).

89 For NanoSIMS experiments, LB was replaced with a defined growth medium approximating LB but  
90 containing either <sup>14</sup>N or <sup>15</sup>N (Celtone<sup>®</sup>, Cambridge Isotopes, USA). While specified for use with  
91 bacteria for isotope analyses, this media was found to contain inhibitory concentrations of trace  
92 metals, which we were able to remove by precipitation by addition of an excess of buffered  
93 phosphate (10 mM) over 24 h with agitation at 150rpm, followed by filtration using a 0.22 µm filter.  
94 This metal-depleted medium containing 5 g/L Celtone<sup>®</sup> was completed with 5 g/L acetate as a C-  
95 source, and basal salts (15 mM ammonium sulfate, 0.2 mM MgSO<sub>4</sub>, 17.6 mM KH<sub>2</sub>PO<sub>4</sub>, 32.7 mM  
96 NaH<sub>2</sub>PO<sub>4</sub>), as determined by our preliminary optimized experiments with *Lysinibacillus* sp. TchIII  
97 20n38. In addition, cultures grown in the presence of <sup>14</sup>N rather than <sup>15</sup>N rapidly ceased vegetative  
98 growth and sporulated. Therefore instead of a standard labelling medium composed of both <sup>14</sup>N and  
99 <sup>15</sup>N, a 100% <sup>15</sup>N-labeled medium, was used to follow the time course of recovery after Fe-exposure.  
100 An additional culture was resuspended in a 100% <sup>14</sup>N medium and immediately sampled as a  
101 baseline control for N isotope abundances. Cultures were incubated in the <sup>15</sup>N-labeled medium at  
102 30 °C with agitation (180 rpm) over a time course of recovery, for both mineralized (M) and non-  
103 mineralized (NM) cultures. Aliquots were removed immediately after addition of growth medium  
104 (T0), and then every 24 h (1d, 2d). At each time point, approximately 20mL aliquots were removed  
105 for optical density measurements, optical microscopy verification of cell morphology, and filtered for  
106 scanning electron microscopy observations and NanoSIMS analyses as described below. Abiotic  
107 (non-inoculated) controls were used for comparison to distinguish mineralization due to the presence  
108 of *Lysinibacillus* sp. TchIII 20n38 cells.

### 109 **2.3 Scanning Electron Microscopy**

110 Aliquots of bacterial cultures as well as abiotic controls (not inoculated with *Lysinibacillus* sp. TchIII  
111 20n38 cells) were filtered through a 0.2 µm GTTP isopore polycarbonate filters using a Swinnex  
112 filter holder (Merck Millipore, Darmstadt, Germany). Filters were then air-dried, mounted on  
113 aluminum supports with carbon tape, and coated with carbon (7-8 nm thickness), gold (7 nm  
114 thickness), or platinum (5 nm thickness). Scanning electron microscopy (SEM) observations were  
115 performed using two different instruments; a Hitachi SU 3500 SEM installed at the electron  
116 microscopy platform of the Muséum National d'Histoire Naturelle (Paris, France), and a Zeiss Ultra  
117 55 field emission gun SEM equipped with a Bruker EDS QUANTAX detector (Bruker  
118 Corporation, Houston, TX, USA) installed at IMPMC (Sorbonne Université, Paris, France). For  
119 observations using the Hitachi SU 3500 instrument observations were made in secondary electron  
120 mode with an acceleration voltage of 15 kV. SEM-FEG images were acquired in secondary electron  
121 mode using with the Zeiss Ultra 55 instrument with an in column detector (InLens) at 2 kV to 5 kV  
122 and a working distance of 3 mm. Energy dispersive X-ray spectroscopy (EDX) analyses were  
123 performed at 15 kV and a working distance of 7.5 mm after calibration with reference copper.

## 124 **2.4 Nano Secondary Ion Mass Spectrometry (NanoSIMS)**

125 NanoSIMS sample preparations followed the protocol of (Miot et al., 2015). Briefly, aliquots of  
126 bacterial cultures sampled from labeled and unlabeled media filtered through 0.2  $\mu\text{m}$  GTTP isopore  
127 polycarbonate filters previously Au-coated (20 nm thickness) using a Swinnex filter holder (Merck  
128 Millipore, Darmstadt, Germany). Quantitative ion images were recorded by the NanoSIMS50  
129 (Cameca, Gennevilliers, France) installed at the National Museum of Natural History of Paris,  
130 France. All measurements were performed using the same analytical conditions. A Cs + primary  
131 beam of 0.8 pA scanned an area of 20  $\mu\text{m}$   $\times$  20  $\mu\text{m}$ , divided into 256 pixels  $\times$  256 pixels, with a  
132 counting time of 1 ms per pixel. Secondary ion images of  $^{31}\text{P}^{16}\text{O}^-$ ,  $^{12}\text{C}^{14}\text{N}^-$ , and  $^{12}\text{C}^{15}\text{N}^-$  were  
133 recorded. The mass resolution power was adjusted to 9000 to resolve isobaric interferences at mass  
134 27 such as  $^{13}\text{C}^{14}\text{N}^-$  or  $^{11}\text{B}^{16}\text{O}^-$  from  $^{12}\text{C}^{15}\text{N}^-$ . Before any analysis, the surface of each sample was pre-  
135 sputtered during 5 min with a 80 pA Cs- primary ion beam over 30  $\mu\text{m}$   $\times$  30  $\mu\text{m}$  to eliminate the  
136 contamination of the surface, and reached the stable state of sputtering (Thomen et al., 2014).  
137 Instrument stability was verified throughout the session using a type 3 kerogen standard. NanoSIMS  
138 data were then processed using the IMAGE software (L. Nittler, Carnegie Institution for Science,  
139 Washington, DC, USA).

## 140 **2.5 Statistical Analyses**

141 The preference of this strain of *Lysinibacillus* for  $^{15}\text{N}$  to maintain vegetative growth eliminated the  
142 possibility of using a  $^{14}\text{N}$  control throughout the time course of recovery. In order to automatically  
143 remove the random noise from all the  $^{12}\text{C}^{14}\text{N}^-$  and  $^{12}\text{C}^{15}\text{N}^-$  NanoSIMS images, we defined  $^{12}\text{C}^{14}\text{N}^-$ -  
144 and  $^{12}\text{C}^{15}\text{N}^-$  independent thresholds based on their respective distribution for the images of samples  
145 that were resuspended in the  $^{14}\text{N}$ -labelled medium. Each elemental distribution was fitted by two  
146 Gaussian components (R-package mixtools, (Benaglia et al., 2009)). We define threshold as the mean  
147 of the 97.5th percentile of the first Gaussian component (noise) and the 2.5th percentile of the second  
148 one (signal).

149 For each image, the denoised dataset further used for statistical analyses is composed only of pixels  
150 with both  $^{12}\text{C}^{14}\text{N}^-$  and  $^{12}\text{C}^{15}\text{N}^-$  values above the respective thresholds. The isotope abundance  $^{12}\text{C}^{15}\text{N}^-$ -  
151 / ( $^{12}\text{C}^{14}\text{N}^-$  +  $^{12}\text{C}^{15}\text{N}^-$ ) of this dataset (hereafter named processed  $^{15}\text{N}/(^{14}\text{N}+^{15}\text{N})$  ratio) was used to  
152 follow the kinetics of incorporation of N (as part of protein production) by non-mineralized and  
153 mineralized bacteria. For each image, the distribution of processed  $^{15}\text{N}/(^{14}\text{N}+^{15}\text{N})$  ratio was fitted  
154 using Gaussian mixture modeling (R-package mclust, (Scrucca et al., 2016)) in order to infer  
155 subpopulations of pixels. The best univariate model, composed of  $k$  Gaussian components with either  
156 equal or unequal variance, was selected based on Bayesian Information Criterion. The mixing  
157 proportions for the components represent the proportions of the  $k$  subpopulations of pixels.

158 Cluster analysis was performed in order to group the samples according to their subpopulation  
159 composition. Each image was described by a vector of 10 values, each corresponding to the sum of  
160 the mixing proportions for the Gaussian components whose mean falls in a given  $^{15}\text{N}/(^{14}\text{N}+^{15}\text{N})$  ratio  
161 interval (10 intervals of size 0.1 each). An image-to-image distance matrix generated by computing  
162 Bray-Curtis dissimilarity index between all the pairs of vectors was used for hierarchical  
163 agglomerative clustering of images (unweighted pair group method with arithmetic mean linkage).

164 All analyses were conducted in R version 3.2.3 (R Core team, 2015).

## 165 **3 Results**

### 166 **3.1 *Lysinibacillus* sp. S-layers Become Encrusted After Exposure to Iron**

167 *Lysinibacillus* sp. TchIII 20n38 was isolated from soils contaminated by radionuclides and metals,  
168 resulting in a moderately acidic pH (5.5) (Chapon et al., 2012). Our work with this strain, like other  
169 isolates from the same site, has shown that it is resistant to a range of heavy metals and radionuclides  
170 (*article in preparation*). To determine the mechanisms of this metallotolerance, we exposed cells to a  
171 Fe-rich solution at acidic pH in the absence of the preferred carbon source for this strain, acetate,  
172 while maintaining high levels of phosphate required by *Lysinibacillus* sp.. Non-metabolic metal-  
173 tolerance mechanisms are favored under these conditions.

174 After exposure, Fe-minerals were observed to form on the surface of *Lysinibacillus* sp. cells leading  
175 to complete encrustation of the cells over time (see Fig. 1). EDX analyses of mineral-encrusted cells  
176 confirmed the composition as a Fe-phosphate (see Supplementary Figure 1). Some abiotically formed  
177 Fe-phosphates were also observed, which were easily distinguishable from mineralized S-layers as  
178 aggregates of larger spherically-shaped minerals not associated with cells, and matching the types of  
179 minerals observed in non-inoculated controls.

180 Cells were fully mineral encrusted after 16 h of exposure to the Fe-rich solution, whether cells were  
181 exposed in mid-exponential, late-exponential, or stationary growth phase ( $OD_{600nm} = 0.3, 0.6, \text{ and } 1.0$ ,  
182 respectively). Longer exposures (20 h and 41 h) did not alter the extent mineralization.

183 Attempts to confirm whether the mineralization observed on *Lysinibacillus* sp. TchIII 20n38 cells  
184 was due to a completely non-metabolic process, or whether active metabolism by living cells was  
185 necessary for S-layer mineralization were limited due to an inability to obtain dead cells without  
186 damaging the S-layer containing cell envelope. This despite multiple trials employing various  
187 antibiotics targeting non-cell envelope structures, and testing them over a large range of  
188 concentrations and durations [tetracycline (10-2000  $\mu\text{g}/\text{mL}$  for 1 h-5 d in LB, buffer, or MilliQ- $\text{H}_2\text{O}$ )  
189 ofloxacin (10-500  $\mu\text{g}/\text{mL}$ ), and heat treatments (up to  $55^\circ\text{C}$ )]. The fact that *Lysinibacillus* sp. TchIII  
190 20n38 cells grow optimally as heterotrophs without added metals suggests that the role of any  
191 metabolic processes in S-layer mineralization was secondary to non-metabolic processes.

### 192 **3.2 Physiological State of Cells Depends on Times of Mineralization and Recovery**

193 Replacement of mineral-encrusted cells into a rich growth medium demonstrated that *Lysinibacillus*  
194 sp. TchIII 20n38 cells were able to resume proper cell division after complete Fe-mineral  
195 encrustation. The exposure of mid-exponential growth phase cells ( $OD_{600nm} = 0.3$ ) to the Fe-rich  
196 solution for 16 h followed by recovery of the cultures in LB showed that cells resumed normal cell  
197 division (see Supplementary Figure 2). However, the physiological state of the cells during metal  
198 exposure affected the ability of cells to recover after mineral encrustation, resulting in various  
199 inhibitions of normal vegetative cell growth and division. For mid-exponential growth phase cells,  
200 exposures longer than 16 h to the Fe-rich solution resulted in the death of mineralized cells, and the  
201 formation of filaments by the small minority of cells observed without mineral-encrustation. In the  
202 case of both late-exponential growth phase and stationary phase cultures, even 16 hour-long  
203 exposures to Fe resulted in sporulation and/or cell death.

### 204 **3.3 Mineral-Encrusted S-layers Can Be Shed**

205 SEM observations were made of mid-exponential growth phase *Lysinibacillus* sp. TchIII 20n38 cells  
206 after a 16 h exposure to the Fe-rich solution. Mineralized S-layers devoid of a cell were observed,  
207 often with the cells located beside these empty mineralized S-layer shell (see Fig. 2 panel A, left and

208 right images). After incubation in LB for up to 5 d following Fe-mineralization, cells were seen  
209 exiting mineralized S-layer cells, with cell division septa visible (see Fig. 2 panel B, top and bottom  
210 images), in concordance with increases in the optical density of the cultures (see Supplementary  
211 Figure 2).

### 212 **3.4 *Lysinibacillus* sp. Cell Morphology Changes During S-layer Shedding**

213 The cell morphology in both mineralized and non-mineralized cultures was altered over the time  
214 course of recovery (see Fig. 3). In non-mineralized cultures which were kept at the same pH as the  
215 mineralized cultures but in the absence of iron, cells gradually shrank in size and became ovoid in  
216 shape over two days of incubation in the metal-depleted Celtone® medium. While cell death was  
217 minimal for non-mineralized cells, dead cells were easily distinguishable due to both their high  
218  $^{12}\text{C}^{14}\text{N}^-$  counts due to lack of  $^{15}\text{N}$  incorporation, and their sustained rod shape (see image of non-  
219 mineralized cells 1 d in Fig. 4). Non-mineralized cells also formed intracellular polyphosphate  
220 granules between 1 d and 2 d of incubation, as evidenced by analyses of  $^{31}\text{P}^{16}\text{O}^-$  counts (see Fig. 4).

221 Mineralized cultures showed little change over the first day of incubation. On the second day,  
222 however, cells were observed outside of their mineralized S-layer shells, with biofilm formation  
223 evidenced as a mucoid phenotype (see Fig. 3) together with increases in optical density of the  
224 cultures (see Supplementary Figure 3). SDS-PAGE and mass spectrometry confirmed the presence of  
225 S-layer glycoproteins throughout the time course of recovery (see Supplementary Figures 4 and 5).  
226 Shed, mineralized S-layers maintained the elongated rod shape of non-stressed *Lysinibacillus* sp.  
227 TchIII 20n38 cells and restricted  $^{31}\text{P}^{16}\text{O}^-$  to their surfaces (see Fig. 4), likely within the Fe-phosphate  
228 minerals analyzed by EDX in Figure 2. In comparison, newly emerged cells lacked surface  
229 phosphates, some cells concentrating phosphate as intracellular granules (see Fig. 4). On the third  
230 day of incubation, cells in both mineralized and non-mineralized cultures began to sporulate.

### 231 **3.5 Sub-populations of Cells Co-exist During Time course of Recovery**

232 In order to describe the process of S-layer regeneration after mineral encrustation, and to determine if  
233 the S-layers were indeed regenerated, we followed the recovery of *Lysinibacillus* sp. TchIII 20n38  
234 cells over time after Fe-mineral encrustation. Both SEM observations of cell morphology and  
235 NanoSIMS analyses of cell activity using incorporation of nitrogen, needed for the production of new  
236 S-layer proteins.  $^{15}\text{N}$ -incorporation is an effective marker, as S-layer proteins are one of the most  
237 abundant cellular proteins, and roughly 20% of total protein synthesis can be dedicated to their  
238 production (Sleytr et al., 2007). The  $^{15}\text{N}$  incorporation over time was determined using  
239  $^{12}\text{C}^{15}\text{N}/(^{12}\text{C}^{15}\text{N}+^{12}\text{C}^{14}\text{N})$  and statistical analyses of the  $^{15}\text{N}/(^{14}\text{N} + ^{15}\text{N})$  were then performed (see  
240 example of sample M\_T0\_rep2 in Fig. 5, Supplementary Figure 6). In order to account for  
241 differences in cell morphology over time and between mineralized and non-mineralized samples,  
242 statistical analyses were performed using all pixels above the established threshold from each image.  
243 At least three processed  $^{15}\text{N}/(^{14}\text{N} + ^{15}\text{N})$  images were analyzed per sample time point for samples  
244 incubated in medium containing  $^{15}\text{N}$  (two images each for natural abundance controls), with 10 to  
245 <60 cells per image depending on the physiological state of the cells over the time course.  
246 Subpopulations of pixels were identified for each sample according to the distribution of processed  
247  $^{15}\text{N}/(^{14}\text{N} + ^{15}\text{N})$  ratio (see Fig. 5). Figure 5 shows that at the start of the time course (T0), the  
248 mineralized cells had  $^{15}\text{N}/(^{14}\text{N} + ^{15}\text{N})$  ratios below 0.5 (panel A), with most cells having a ratio near  
249 0.3 (panel B). Pixel subpopulations clustered around cells (panel C), with most mineralized cells and  
250 abiotic mineralization retaining a small amount of  $^{15}\text{N}$  (panel D) during the brief exposure prior to  
251 washing the cells in the first few minutes of the experiment.

252 Clustering of the NanoSIMS images according to their distribution of processed  $^{15}\text{N}/(^{14}\text{N} + ^{15}\text{N})$  ratio  
253 showed that the samples tended to cluster over the experimental time course into three different  
254 groups; "natural abundance" ( $^{14}\text{N}$ ) T0 controls, low  $^{15}\text{N}$  incorporation (NM\_T0, M\_T0, M\_1d), and  
255 significant  $^{15}\text{N}$  incorporation (NM\_1d, NM\_2d, M\_2d) (see Fig. 6). The fact that controls for the  
256 natural abundance (NM\_no incubation, M\_no incubation) grouped separately from the T0 samples  
257 shows that even brief exposure to the  $^{15}\text{N}$ -labelled medium during cell resuspension had an effect on  
258 the isotopic composition of the cells. The T0 samples were therefore used as the baseline of  
259 comparison for all later time-points. The two remaining groups were composed of cells cultivated in  
260  $^{15}\text{N}$ -labelled medium, grouped by whether or not cell division had restarted. Low  $^{15}\text{N}$ -incorporation  
261 samples (M\_T0, NM\_T0, M\_1d) corresponded to cells not yet showing evidence of cell division,  
262 whereas samples with significant  $^{15}\text{N}$  incorporation (NM\_1d, NM\_2d, M\_2d) showed clear evidence  
263 of active cell division when observed by SEM (see Fig. 3, black arrowheads) and measurements of  
264 optical density (see Supplementary Figure 3).

265 Variations between replicate images were minimal for all samples with the exception of both  
266 mineralized and non-mineralized 2 d samples, as seen in the heat map representation. The weighted  
267 distribution of subpopulations remained low for all samples prior to restart of cell division (see Fig. 6  
268 and Supplementary Figure 6, samples M\_T0, M\_1d, NM\_T0). The increase in pixel subpopulations  
269 for samples showing signs of recovery and cell division (samples NM\_1d, NM\_2d, M\_2d) reflects  
270 the heterogeneity of cell recovery. Heterogeneity in  $^{15}\text{N}$  incorporation was highest for cells  
271 immediately after S-layer shedding (M\_2d samples), which is likely a reflection of natural variations  
272 in the capacity of *Lysinibacillus* sp. TchIII 20n38 cells to respond to stress.

### 273 **3.6 S-layers are Regenerated Within Two Days of Fe-Mineral Encrustation**

274 Some cell-free mineralized S-layer shells were observed by SEM immediately after 16 h exposure to  
275 the Fe-rich solution (see Fig. 3). However, the morphology of the cells remained generally  
276 unchanged through 1 d of incubation in the defined medium. At 2 d of incubation in this medium,  
277 SEM observations clearly show a majority of non-mineralized cells alongside the remaining, cell-  
278 free, mineralized S-layer shells. Analyses of  $^{15}\text{N}$  uptake using NanoSIMS confirmed this timing,  
279 showing no significant  $^{15}\text{N}$  incorporation for mineralized samples prior to 2 d of recovery in labelled  
280 medium, compared to T0 control aliquots that were removed immediately after resuspension of cells  
281 in the labelled medium (see Fig. 6). The S-layers of mineralized samples remained at a relatively  
282 steady  $^{15}\text{N}/(^{14}\text{N} + ^{15}\text{N})$  ratio (see green regions in Supplementary Figure 6, mineralized samples)  
283 compared to the emerging cells, showing that mineralized S-layers did not incorporate  $^{15}\text{N}$  during the  
284 cell division processes giving rise to the emerging cells. This is coherent with S-layer shedding and  
285 complete regeneration. S-layer presence before and after mineralization and shedding was confirmed  
286 by SDS-PAGE and mass spectrometry (see Supplementary Figure 4 and 5).

## 287 **4 Discussion**

### 288 **4.1 *Lysinibacillus* sp. TchIII 20n38 Is Highly Adapted for Survival Under Stress** 289 **Conditions**

290 The bacterial isolate used in this study, *Lysinibacillus* sp. TchIII 20n38, is a metallotolerant gram-  
291 positive bacterium (*article in preparation*), possessing a cell envelope composed of the plasma  
292 membrane surrounded by a thick layer of peptidoglycan capped by an S-layer forming an ordered  
293 structure at the cell surface. This flexible cage-like structure is in direct contact with the surrounding  
294 environment, and thus provides the primary protective element against potentially toxic  
295 environmental concentrations of heavy metals or radionuclides. *Lysinibacillus* sp. TchIII 20n38

296 demonstrated many adaptive mechanisms to the stresses induced by nutrient limitation and/or the  
297 presence of iron, as might be expected for a bacterium isolated from a radioactive waste disposal site.  
298 These included the accumulation and enlargement of intracellular polyphosphate granules and  
299 sporulation under phosphate-limiting conditions, cell size reduction and morphology alterations from  
300 rod-shaped to ovoid cells after metal stress, as well as reductions in biofilm after exposure to either  
301 iron or acidic pH and augmentation in biofilm after a return to neutral pH in the absence of additional  
302 iron input. Polyphosphate accumulation is a common mechanism used by bacteria, including  
303 *Lysinibacillus sphaericus*, in response to nutrient stress (depletion of amino acids), and prior to  
304 sporulation (Shi et al., 2015; Tocheva et al., 2013).

#### 305 **4.2 S-layer Shedding Mechanism in *Lysinibacillus* as a Response to Metal Stress**

306 S-layers from a variety of prokaryotes are known to induce mineral formation. The S-layers of  
307 cyanobacteria are able to nucleate selenite and strontium (Schultze-Lam and Beveridge, 1994), while  
308 the S-layers of thermophilic archaea can form amorphous Fe-phosphate minerals in the quasi-  
309 periplasmic space between the S-layer and the underlying lipid membrane (Kish et al., 2016). Diverse  
310 *Lysinibacillus* sp. have been observed to precipitate minerals on their cell surfaces, including U-  
311 phosphates (Merroun et al., 2005; Mondani et al., 2011) and calcium carbonate (Kaur and Mukherjee,  
312 2013). Here, we show that *Lysinibacillus* sp. TchIII 20n38 cells become encrusted with Fe-minerals  
313 after exposure to high concentrations of iron under mildly acidic conditions. Mineral precipitation by  
314 the cell surfaces, including S-layers, prevent damages to cells including oxidative stress, enzyme  
315 deactivation, protein denaturation, and membrane disruption (Lemire et al., 2013). Iron precipitation  
316 nucleated by the S-layer proteins prevents an overproduction of free radicals in the cytosol due to  
317 Fenton chemistry.

318 While mineral formation on S-layers is known, the mechanisms for removing such barriers to  
319 exchange with the surrounding environment are not as well understood. Mechanisms identified to  
320 date have described partial removal of cell envelope components after metal interactions, particularly  
321 membrane vesicle formation (Kish et al., 2016; McBroom and Kuehn, 2007; Shao et al., 2014).  
322 Partial shedding of S-layer fragments has also been observed, both for mineralized cyanobacterial S-  
323 layers (Schultze-Lam and Beveridge, 1994; Schultze-Lam et al., 1992) and non-mineralized S-layers  
324 for stationary phase bacteria likely as part of cell wall turnover (Luckevich and Beveridge, 1989).  
325 During the course of normal cell growth in the closely related *Lysinibacillus sphaericus*, bands of S-  
326 layer monomer insertion form on cell surfaces, and in the course of cell division new S-layer  
327 monomers are only inserted at the newly-formed the poles (Howard et al., 1982).

328 Here we show that *Lysinibacillus* sp. cells were able to recover normal growth after mineral  
329 encrustation through a shedding of mineralized S-layers, followed by S-layer regeneration. To our  
330 knowledge, this is the first report of complete S-layer shedding and regeneration. S-layer shedding  
331 required an additional 24h before cells returned to normal cell division compared to non-mineralized  
332 cells, as shown by the clustering of <sup>15</sup>N uptake by 2 d mineralized cells with 1 d non-mineralized  
333 samples as measured by NanoSIMS over a time course after exposure to iron. Uptake of <sup>15</sup>N also  
334 illustrated that despite extensive mineralization, cells retained active metabolism. The continued  
335 presence of shed, mineralized S-layers composed of <sup>14</sup>N-based proteins alongside cells bearing newly  
336 regenerated <sup>15</sup>N-bearing S-layers resulted in the heterogeneity in <sup>15</sup>N-incorporation for the M\_2d  
337 samples (see Fig. 6). S-layer shedding activity was limited to cells in mid-exponential growth phase,  
338 providing an advantage over cells in stationary growth phase in Fe-rich conditions.

#### 339 **4.3 Potential Applications of S-layer Regeneration in Bioremediation**



340 S-layers have a strong potential for use biotechnology, due to the combination their capacities for  
341 both self-assembly and metal binding. S-layers have been used as templates to nucleate the  
342 fabrication of metal nanoparticles (Pollmann and Matys, 2007) that can be applied as biocatalysts  
343 (Creamer et al., 2007) or exploited for their unique magnetic properties (Bartolomé et al., 2012). S-  
344 layers assembled in vitro have been proposed as bio-filters for bioremediation technologies  
345 (Pollmann et al., 2006).

346 The total S-layer shedding and regeneration shown here after mineral encrustation opens further  
347 possibilities for a self-renewing bioremediation system, employing soil bacteria already tolerant to  
348 metals and radionuclides.

## 349 **5 Conflict of Interest**

350 *The authors declare that the research was conducted in the absence of any commercial or financial*  
351 *relationships that could be construed as a potential conflict of interest.*

## 352 **6 Author Contributions**

353 AK and LR contributed conception and design of the study; AC performed the experiments, LR  
354 performed NanoSIMS measurements, CL and SZ performed mass spectrometry analyses; ED  
355 performed the statistical analysis of NanoSIMS data; AK wrote the first draft of the manuscript; AC  
356 wrote sections of the manuscript. All authors contributed to manuscript revision, read and approved  
357 the submitted version.

## 358 **7 Funding**

359 This work was supported by the French national program EC2CO-MicrobiEn, project "SkinDEEP",  
360 awarded to AK. The National NanoSIMS facility at the MNHN was established by funds from the  
361 CNRS, Région Ile de France, Ministère délégué à l'Enseignement supérieur et à la Recherche, and  
362 the MNHN. The Scanning Electron Microscope (SEM) facility of the Institut de Minéralogie,  
363 Physique des Matériaux et Cosmochimie is supported by Région Ile de France grant SESAME 2006  
364 N°I-07-593/R, INSU-CNRS, INP-CNRS, Sorbonne Universités, and by the French National  
365 Research Agency (ANR) grant no. ANR-07-BLAN-0124-01.

## 366 **8 Acknowledgments**

367 The authors gratefully acknowledge Virginie Chapon for giving us the strain used in this study, along  
368 with helpful discussions. The authors thank Adriana Gonzalez-Cano and Rémi Duhamel for  
369 assistance with NanoSIMS analyses, and Imène Esteve of the Scanning Electron Microscope (SEM)  
370 facility of the Institut de Minéralogie, Physique des Matériaux et Cosmochimie for assistance with  
371 imaging, which was greatly appreciated. We also wish to thank Jennyfer Miot for productive  
372 discussions.

## 373 **9 References**

374 Ahmed, I., Yokota, A., Yamazoe, A., and Fujiwara, T. (2007). Proposal of *Lysinibacillus*  
375 *boronitolerans* gen. nov. sp. nov., and transfer of *Bacillus fusiformis* to *Lysinibacillus fusiformis*  
376 comb. nov. and *Bacillus sphaericus* to *Lysinibacillus sphaericus* comb. nov. *Int J Syst Evol Microbiol*  
377 57, 1117–1125. doi:10.1099/ijs.0.63867-0.

- 378 Bartolomé, J., Bartolomé, J., Bartolomé, F., Bartolomé, F., García, L. M., García, L. M., et al. (2012).  
379 Strong paramagnetism of gold nanoparticles deposited on a *Sulfolobus acidocaldarius* S layer. *Phys*  
380 *Rev Lett* 109, 247203. doi:10.1103/PhysRevLett.109.247203.
- 381 Benaglia, T., Chauveau, D., Hunter, D. R., and Young, D. (2009). mixtools: An RPackage for  
382 Analyzing Finite Mixture Models. *J Stat Softw* 32, 1–29. doi:10.18637/jss.v032.i06.
- 383 Chapon, V., Piette, L., Vesvres, M.-H., Coppin, F., Marrec, C. L., Christen, R., et al. (2012).  
384 Microbial diversity in contaminated soils along the T22 trench of the Chernobyl experimental  
385 platform. *Appl Geochem* 27, 1375–1383. doi:10.1016/j.apgeochem.2011.08.011.
- 386 Creamer, N. J., Mikheenko, I. P., Yong, P., Deplanche, K., Sanyahumbi, D., Wood, J., et al. (2007).  
387 Novel supported Pd hydrogenation bionanocatalyst for hybrid homogeneous/heterogeneous catalysis.  
388 *Catal Today* 128, 80–87. doi:10.1016/j.cattod.2007.04.014.
- 389 Howard, L. V., Dalton, D. D., and McCoubrey, W. K. (1982). Expansion of the tetragonally arrayed  
390 cell wall protein layer during growth of *Bacillus sphaericus*. *J Bacteriol* 149, 748–757.
- 391 Kaur, D. N., and Mukherjee, A. (2013). Biomineralization of calcium carbonate polymorphs by the  
392 bacterial strains isolated from calcareous sites. *J Microbil. Biotechnol* 23, 707–714.  
393 doi:10.4014/jmb.1212.11087.
- 394 Kish, A., Miot, J., Lombard, C., Guigner, J.-M., Bernard, S., Zirah, S., et al. (2016). Preservation of  
395 archaeal surface layer structure during mineralization. *Sci Rep* 6, 26152–10. doi:10.1038/srep26152.
- 396 Konhauser, K. O., Schultze-Lam, S., Ferris, F. G., Fyfe, W. S., Longstaffe, F. J., and Beveridge, T. J.  
397 (1994). Mineral precipitation by epilithic biofilms in the Speed river, Ontario, Canada. *Appl Environ*  
398 *Microbiol* 60, 549–553.
- 399 Lemire, J. A., Harrison, J. J., and Turner, R. J. (2013). Antimicrobial activity of metals: mechanisms,  
400 molecular targets and applications. *Nat Rev Micro* 11, 371–384. doi:10.1038/nrmicro3028.
- 401 Luckevich, M. D., and Beveridge, T. J. (1989). Characterization of a dynamic S layer on *Bacillus*  
402 *thuringiensis*. *J Bacteriol* 171, 6656–6667.
- 403 McBroom, A. J., and Kuehn, M. J. (2007). Release of outer membrane vesicles by Gram-negative  
404 bacteria is a novel envelope stress response. *Mol Microbiol* 63, 545–558. doi:10.1111/j.1365-  
405 2958.2006.05522.x.
- 406 Merroun, M. L., Raff, J., Rossberg, A., Hennig, C., Reich, T., and Selenska-Pobell, S. (2005).  
407 Complexation of uranium by cells and S-layer sheets of *Bacillus sphaericus* JG-A12. *Appl Environ*  
408 *Microbiol* 71, 5532–5543. doi:10.1128/AEM.71.9.5532-5543.2005.
- 409 Miot, J., Remusat, L., Duprat, E., Gonzalez, A., Pont, S., and Poinot, M. (2015). Fe  
410 biomineralization mirrors individual metabolic activity in a nitrate-dependent Fe(II)-oxidizer. *Front*  
411 *Microbiol* 6, 879. doi:10.3389/fmicb.2015.00879.
- 412 Mondani, L., Benzerara, K., Carrière, M., Christen, R., Mamindy-Pajany, Y., Février, L., et al.  
413 (2011). Influence of uranium on bacterial communities: a comparison of natural uranium-rich soils  
414 with controls. *PLoS ONE* 6, e25771. doi:10.1371/journal.pone.0025771.

- 415 Phoenix, V. R., Adams, D. G., and Konhauser, K. O. (2000). Cyanobacterial viability during  
416 hydrothermal biomineralisation. *Chem Geol* 169, 329–338.
- 417 Pollmann, K., and Matys, S. (2007). Construction of an S-layer protein exhibiting modified self-  
418 assembling properties and enhanced metal binding capacities. *Appl Microbiol Biotechnol* 75, 1079–  
419 1085. doi:10.1007/s00253-007-0937-5.
- 420 Pollmann, K., Raff, J., Merroun, M., Fahmy, K., and Selenska-Pobell, S. (2006). Metal binding by  
421 bacteria from uranium mining waste piles and its technological applications. *Biotech Adv* 24, 58–68.  
422 doi:10.1016/j.biotechadv.2005.06.002.
- 423 R Core Team (2015). R: A language and environment for statistical computing. R Foundation for  
424 Statistical Computing, Vienna, Austria. Available at <https://www.R-project.org/>
- 425 Rodriguez-Freire, L., Avasarala, S., Ali, A.-M. S., Agnew, D., Hoover, J. H., Artyushkova, K., et al.  
426 (2016). Post Gold King Mine Spill Investigation of Metal Stability in Water and Sediments of the  
427 Animas River Watershed. *Environ Sci Technol*. 50, 11539–11548. doi:10.1021/acs.est.6b03092.
- 428 Schultze-Lam, S., and Beveridge, T. J. (1994). Nucleation of celestite and strontianite on a  
429 cyanobacterial s-layer. *Appl Environ Microbiol* 60, 447–453.
- 430 Schultze-Lam, S., Harauz, G., and Beveridge, T. J. (1992). Participation of a cyanobacterial S layer  
431 in fine-grain mineral formation. *J Bacteriol* 174, 7971–7981.
- 432 Scrucca, L., Fop, M., Murphy, T. B., and Raftery, A. E. (2016). mclust 5: Clustering, Classification  
433 and Density Estimation Using Gaussian Finite Mixture Models. *R J* 8, 289–317.
- 434 Shao, P. P., Comolli, L. R., and Bernier-Latmani, R. (2014). Membrane vesicles as a novel strategy  
435 for shedding encrusted cell surfaces. *Minerals* 4, 74–88. doi:10.3390/min4010074.
- 436 Shi, T., Ge, Y., Zhao, N., Hu, X., and Yuan, Z. (2015). Polyphosphate kinase of *Lysinibacillus*  
437 *sphaericus* and its effects on accumulation of polyphosphate and bacterial growth. *Microbiol Res*  
438 172, 41–47. doi:10.1016/j.micres.2014.12.002.
- 439 Sleytr, U. B., Egelseer, E. M., Ilk, N., Pum, D., and Schuster, B. (2007). S-Layers as a basic building  
440 block in a molecular construction kit. *FEBS J* 274, 323–334. doi:10.1111/j.1742-4658.2006.05606.x.
- 441 Sleytr, U. B., Schuster, B., Egelseer, E. M., and Pum, D. (2014). S-layers: principles and  
442 applications. *FEMS Microbiol Rev* 38, 823–864. doi:10.1111/1574-6976.12063.
- 443 Sleytr, U. B., Schuster, B., Egelseer, E. M., Pum, D., Horejs, C. M., Tscheliessnig, R., et al. (2011).  
444 Nanobiotechnology with S-layer proteins as building blocks. *Prog Mol Biol Transl Sci* 103, 277–352.  
445 doi:10.1016/B978-0-12-415906-8.00003-0.
- 446 Thomen, A., Robert, F., and Remusat, L. (2014). Determination of the nitrogen abundance in organic  
447 materials by NanoSIMS quantitative imaging. *J Anal At Spectrom* 29, 512–519.  
448 doi:10.1039/c3ja50313e.

449 Tocheva, E. I., Dekas, A. E., McGlynn, S. E., Morris, D., Orphan, V. J., and Jensen, G. J. (2013).  
450 Polyphosphate Storage during Sporulation in the Gram-Negative Bacterium *Acetonebma longum*. *J*  
451 *Bacteriol* 195, 3940–3946. doi:10.1128/JB.00712-13.

## 452 10 Supplementary Material

453 The Supplementary Material for this article can be found as a separate file.

## 454 11 Figures

**A**

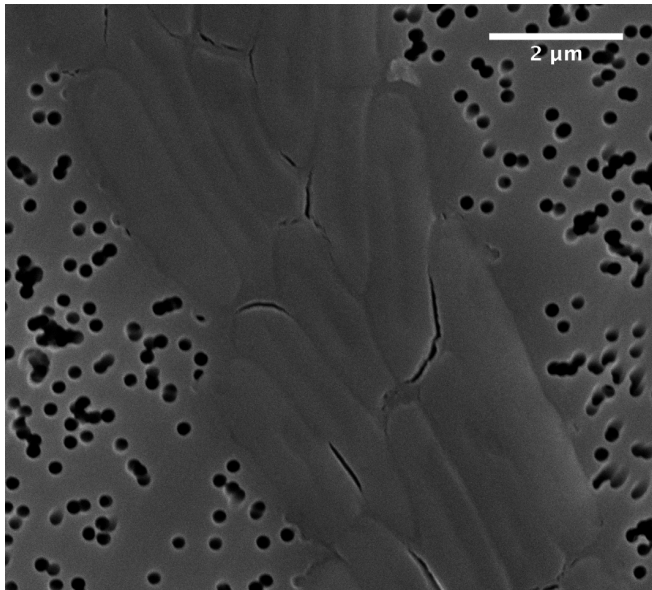

**B**

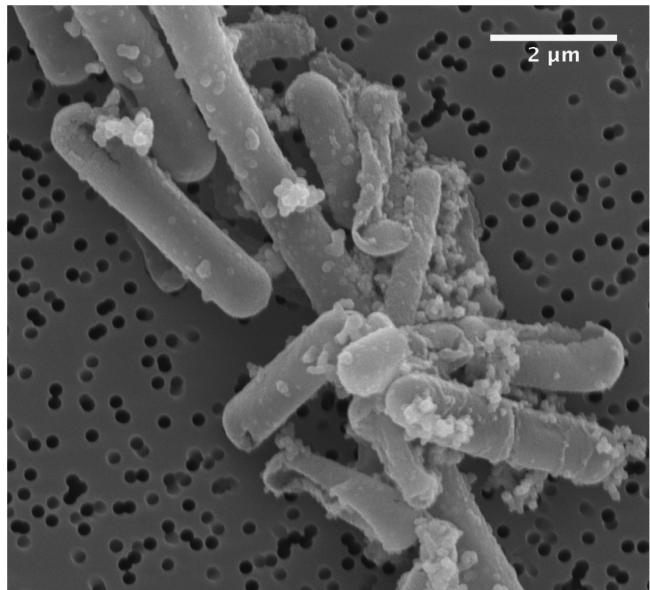

455

456 **Figure 1. Scanning electron microscopy images in secondary electron mode of *Lysinibacillus* sp.**  
457 **TchIII 20n38 cells (A)** grown under optimal conditions, and **(B)** after exposure to an iron-rich  
458 solution (10 mM NaH<sub>2</sub>PO<sub>4</sub>, 10 mM FeSO<sub>4</sub>, pH=4.5). Scanning electron microscopy images acquired  
459 in secondary electron mode.

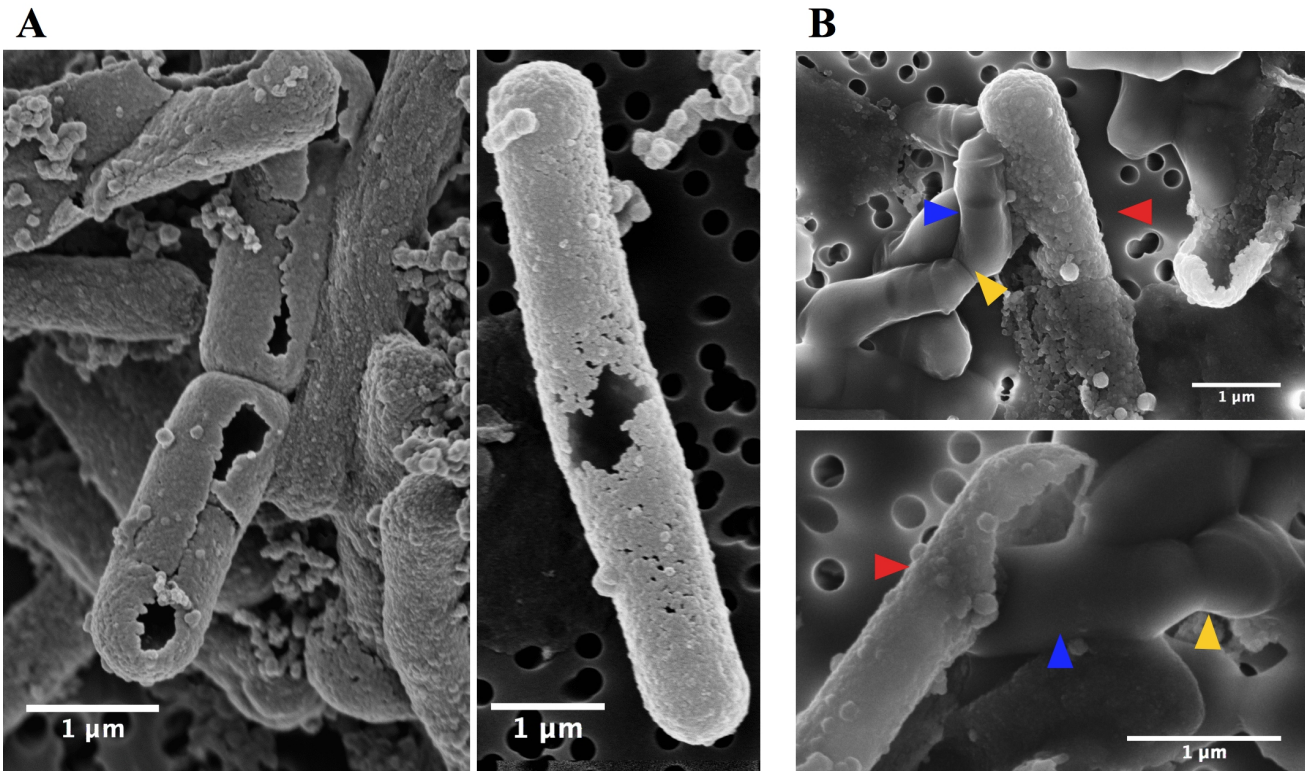

460  
 461 **Figure 2. S-layer mineralization after exposure to Fe** as observed by SEM in secondary electron  
 462 mode. **(A)** Empty mineralized S-layer "shell" lacking a cell observed by SEM (secondary electron  
 463 mode) after a 16 h exposure of a mid-exponential growth phase culture of *Lysinibacillus* sp. TchIII  
 464 20n38 to the Fe-rich solution. Empty S-layer mineral encrustation can be thick (left-side image) or  
 465 thinner and "lacy" (right-side image). **(B)** Top and bottom images show cells emerging from shed  
 466 mineralized S-layers. Cells were in mid-exponential growth phase prior to exposed to Fe, followed  
 467 by incubated in LB for up to 5 days (37 °C, 180 rpm). Blue arrows show emerging cells. Red arrows  
 468 indicate mineralized S-layers. Yellow arrows indicate cell division septa.

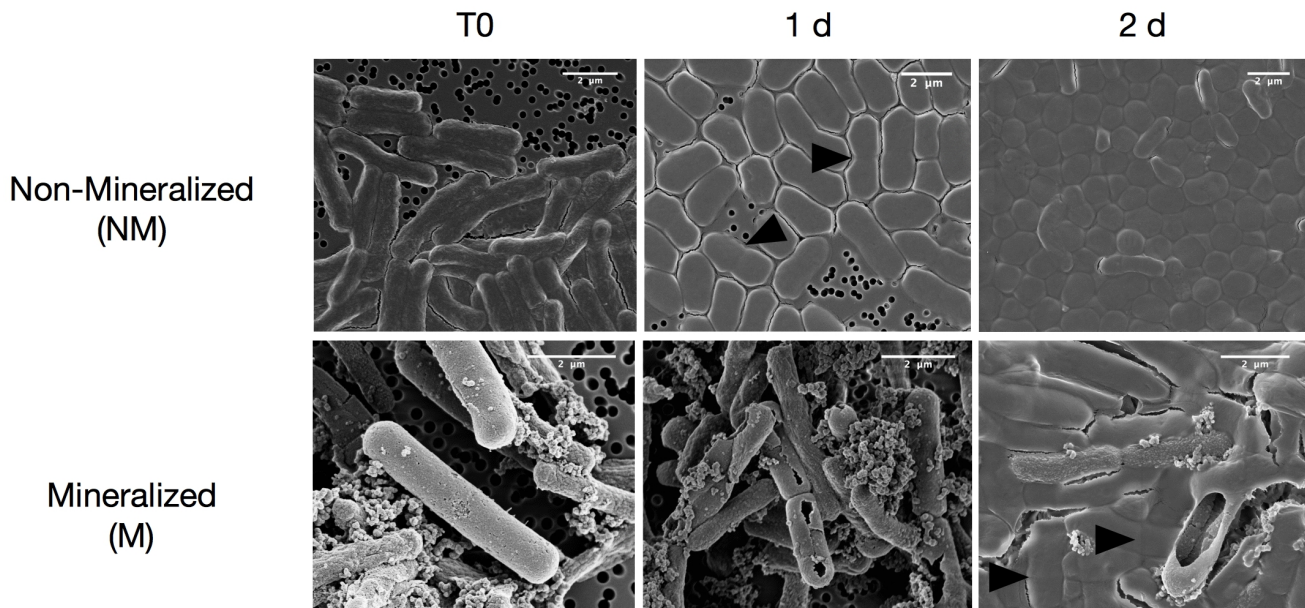

469  
 470 **Figure 3. Scanning electron microscopy images of *Lysinibacillus* sp. TchIII 20n38 cells**

471 (secondary electron mode) for mineralized and non-mineralized cells over a time course of recovery  
472 after Fe-exposure.

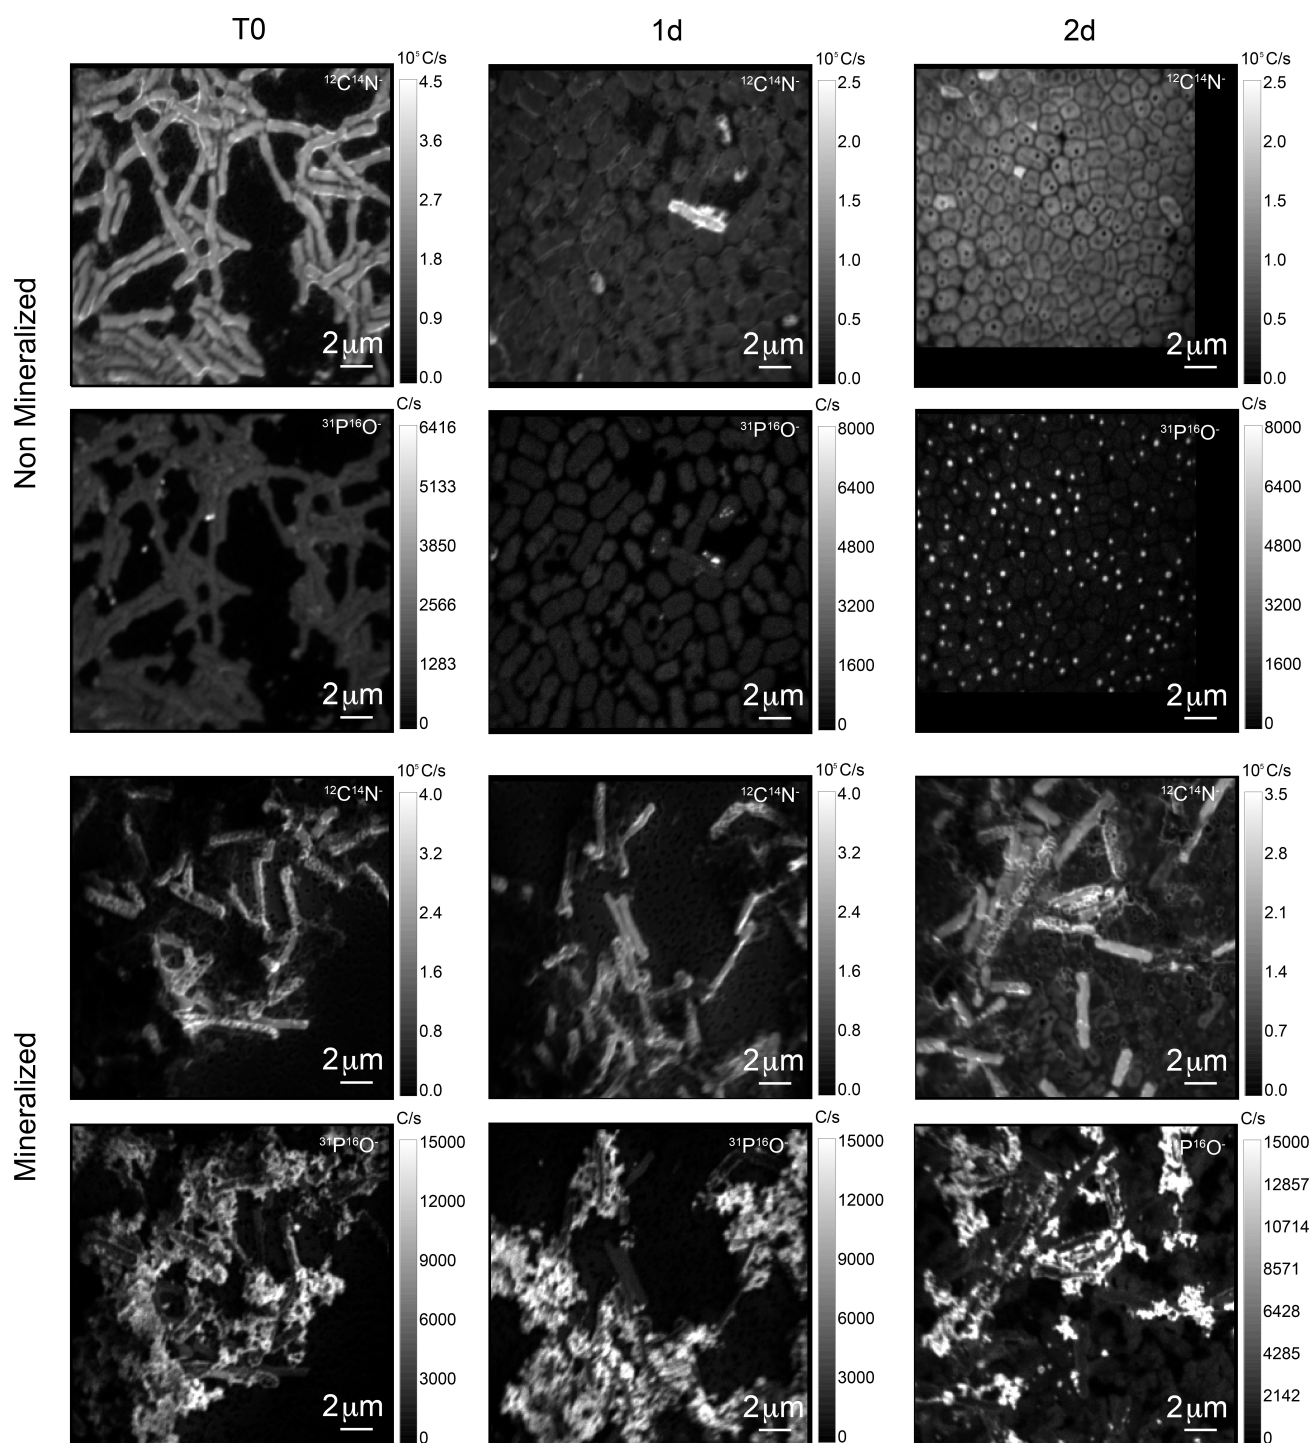

473 **Figure 4.**  $^{12}\text{C}^{14}\text{N}$ - and  $^{31}\text{P}^{16}\text{O}$ - NanoSIMS images for both non-mineralized and mineralized cells  
474 over a time course of recovery after Fe-exposure.  
475

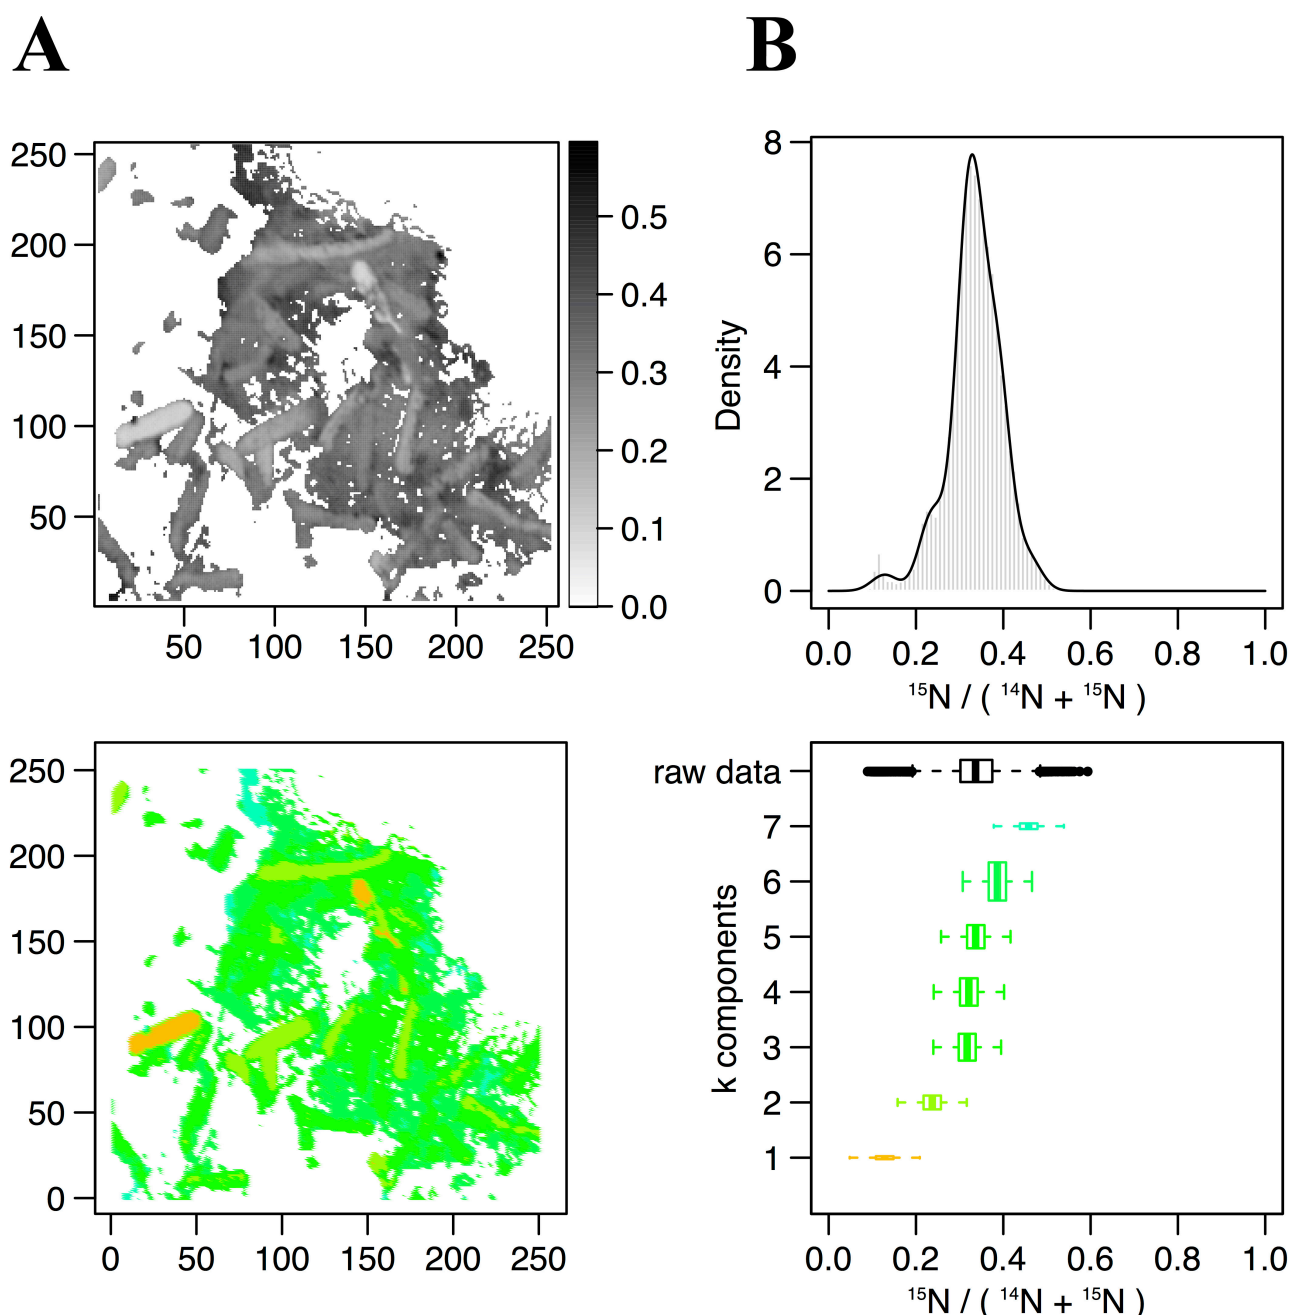

**C**

**D**

476

477

478 **Figure 5. Statistical analysis of  $^{15}\text{N}/(^{14}\text{N}+^{15}\text{N})$  NanoSIMS image for mineralized cells after 2 days**

479 **of recovery (M\_2d\_rep16). (A) Processed  $^{15}\text{N}/(^{14}\text{N}+^{15}\text{N})$  ratio map. (B) Processed  $^{15}\text{N}/(^{14}\text{N}+^{15}\text{N})$**

480 **ratio histogram (gray bars) and probability density (dark line) estimated by Gaussian mixture**

481 **modeling. (C) Map of the pixel subpopulations (see (D) for color code). (D) Decomposition of the**

482 **distribution of processed  $^{15}\text{N}/(^{14}\text{N}+^{15}\text{N})$  ratios (labelled “raw data”) into 4 Gaussian components of**

483 **unequal variance. The box boundaries indicate the first and third quartiles. The bold band inside the**

484 **box corresponds to the median value. The horizontal dashed lines that extend from the box**

485 **encompass the largest/smallest ratio values that fall within a distance of 1.5 times the box size from**

486 **the nearest box hinge. If any, outliers are shown as individual points. Each component of the**

486 **Gaussian mixture is represented by a random sample (n=10000) from the corresponding normal**

487 distribution. The box heights represent the proportions of pixel subpopulations (i.e. the mixing  
 488 proportions for the components). A unique color scale is used for all images, the subpopulation color  
 489 depending on the estimated mean of the Gaussian component.

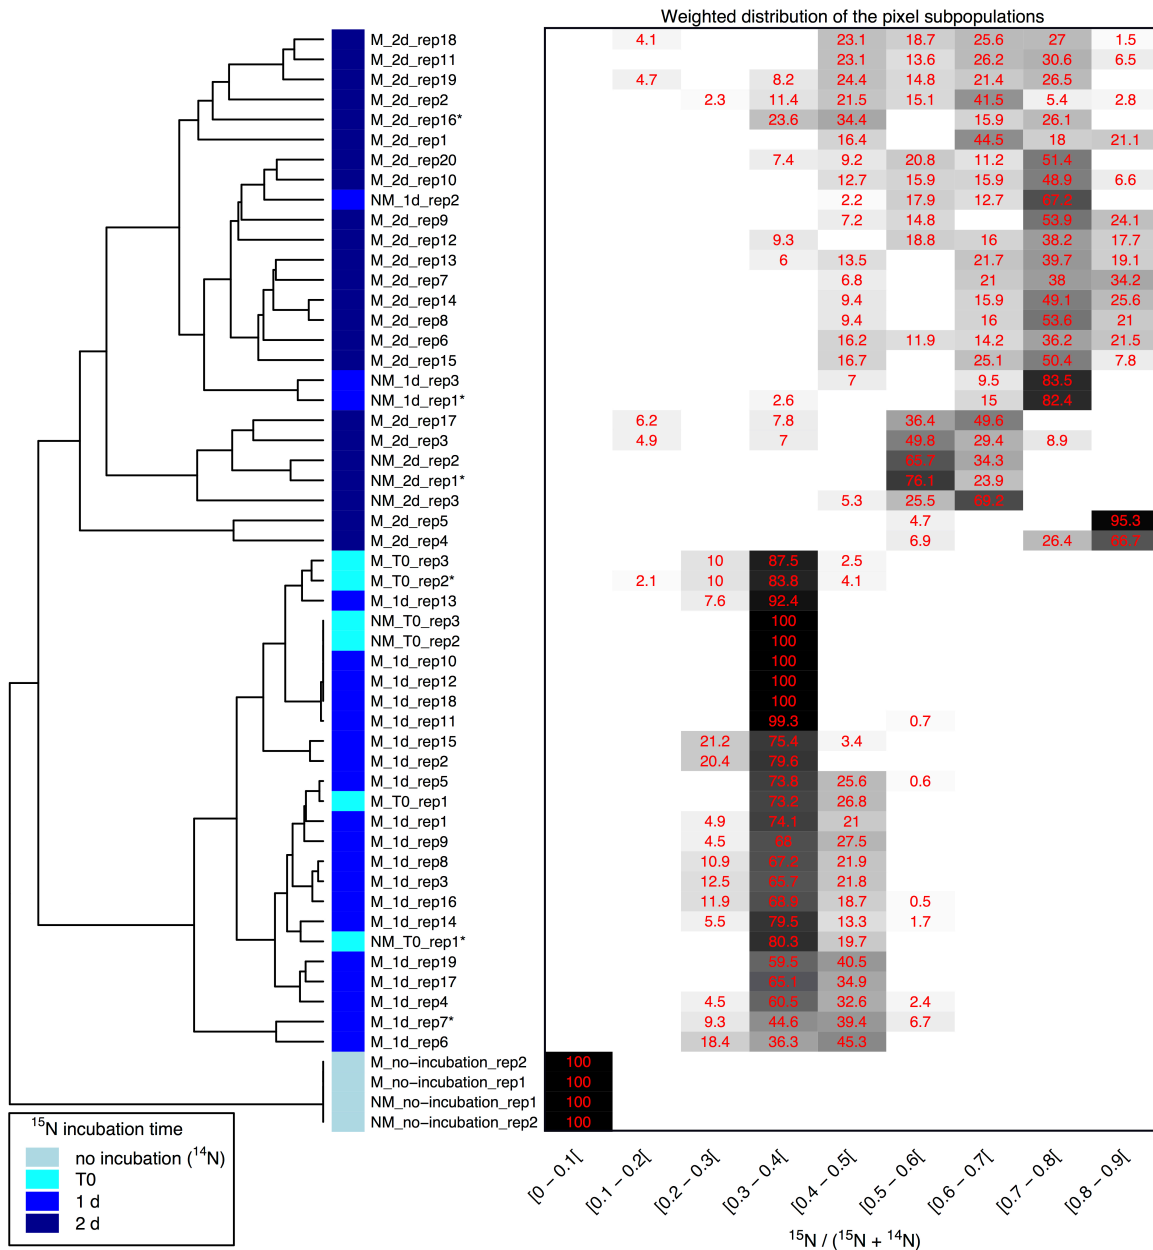

490  
 491 **Figure 6. Clustering of  $^{15}\text{N}/(^{14}\text{N}+^{15}\text{N})$  NanoSIMS images according to the distribution of pixel**  
 492 **subpopulations.** Each row of the heatmap (drawn on the right side of the figure) shows proportion  
 493 (in %) of the pixel subpopulations for a single NanoSIMS image, and columns show the  
 494  $^{15}\text{N}/(^{14}\text{N}+^{15}\text{N})$  ratio intervals. Each value corresponds to the sum of the mixing proportions for the  
 495 Gaussian components whose mean falls in the given interval. Null proportions are hidden. Color  
 496 scale ranges between white (0 %) and black (100 %). Each image is labelled according to the culture  
 497 medium (either M or NM for Mineralized or Non-Mineralized, respectively), the  $^{15}\text{N}$  incubation time,  
 498 and the replicate number (a NanoSIMS image numbering for a given sample). Each image is depicted  
 499 by a color code according to the  $^{15}\text{N}$  incubation time of the sample (see color legend at bottom left).  
 500 The heatmap rows are ordered according to the hierarchical clustering of images illustrated on the left



501 side of the figure. Image labels ending with a star are further illustrated in Figure 6 and  
502 Supplementary Figure 6.
